# Supplementary material
Source: publisher figshare collection journal article supplement (https://rs.figshare.com/ndownloader/files/13851041)
Supplement: Supplementary file 1 [file 13851041]

Supplementary Table 1. Mean (±s.d.) temperature, pH, carbonate chemistry, total alkalinity and salinity of experimental tanks.

|  |  | Treatment | | | |
| --- | --- | --- | --- | --- | --- |
| Parameter | Sample (n) | 1 | 2 | 3 | 4 |
| Temperature | 10 | 15 ± 0.5 | 15 ± 0.5 | 20 ± 0.5 | 20 ± 0.5 |
| pHNBS | 10 | 8.07 ± 0.07 | 7.70 ± 0.05 | 8.05 ± 0.08 | 7.70 ± 0.06 |
| pCO2 (µatm) | 10 | 421.66 ± 51.9 | 1108.50 ± 61.89 | 403.77 ± 43.71 | 1102.59 ± 153.25 |
| ΩCa | 10 | 4.66 ± 1.12 | 2.24 ± 0.57 | 4.86 ± 1.43 | 2.58 ± 0.63 |
| ΩAr | 10 | 2.98 ± 0.71 | 1.43 ± 0.37 | 3.15 ± 0.92 | 1.67 ± 0.41 |
| CO3 (µmol × Kg-1) | 10 | 192.91 ± 46.48 | 92.78 ± 23.96 | 200.33 ± 58.94 | 106.55 ± 26.07 |
| TA (µmol × Kg-1) | 10 | 2645.70 ± 366.56 | 2685.49 ± 396.89 | 2425.74 ± 427.33 | 2605.40 ± 350.82 |
| Salinity (ppt) | 10 | 33 | 33 | 33 | 33 |

pHNIST, pH calibrated using National Institute of Standards and Technology buffers; ΩCa, calcium saturation; ΩAr, aragonite saturation; TA, total alkalinity.
